# Supplementary material for: Molecular Cloning and Biochemical Characterization of a Recombinant Sterol 3-O-Glucosyltransferase fromGymnema sylvestreR.Br. Catalyzing Biosynthesis of Steryl Glucosides
Source: Hindawi journal article supplement (doi:10.1155/2014/934351), 2014-01-01
Supplement: f1 [file 934351.f1.pdf]

## Supplementary Figures

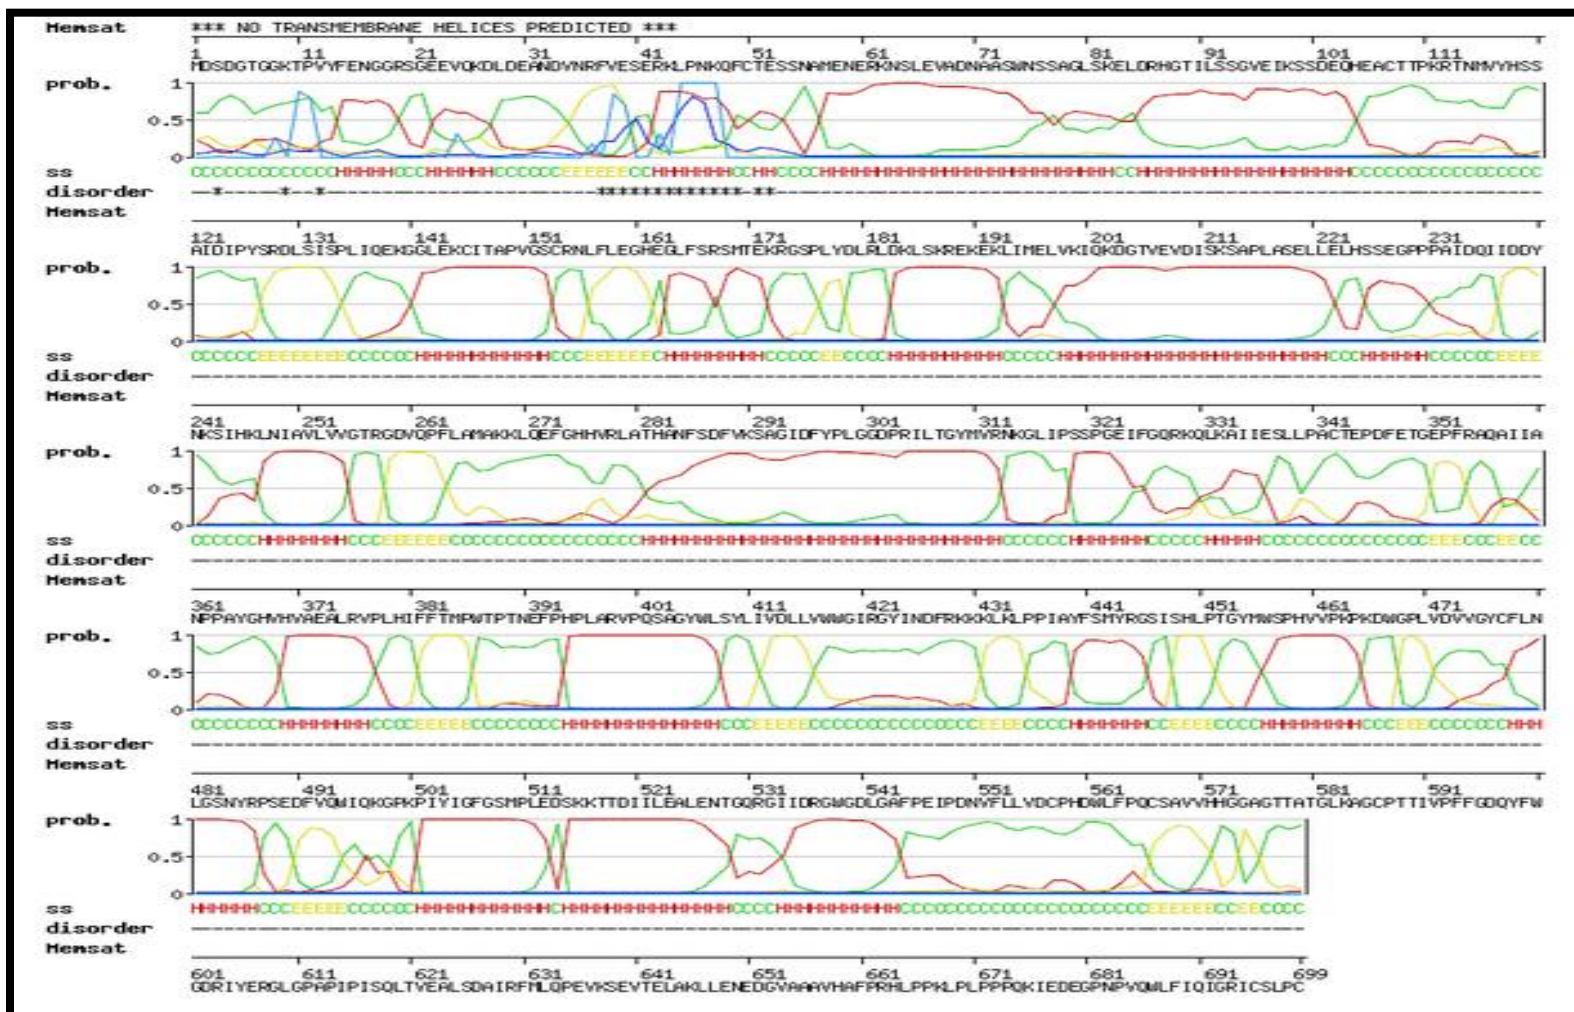

### Secondary Structure

H helix  
E extended-beta  
C coil

### Disorder

\* disorder  
- order  
filter  
output

### Mensat

O: Outside helix cap  
I: Inside helix cap  
X: Central transmembrane helix segment  
S: Possible N-terminal signal peptide  
-: Inside loop  
+: Outside loop

**SUPPLEMENTARY FIGURE 1:**

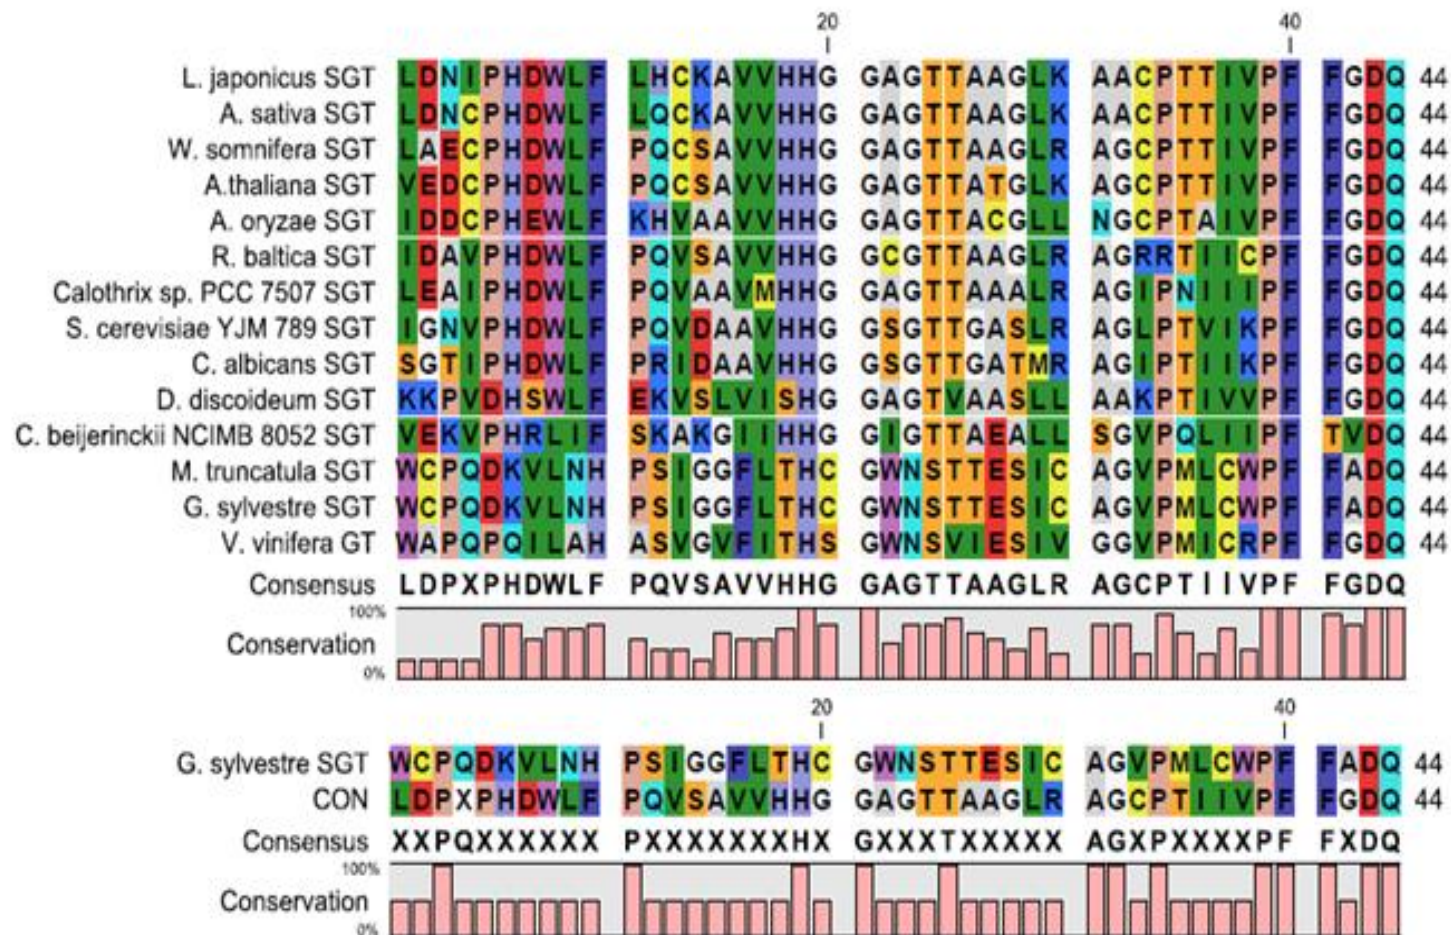

**SUPPLEMENTARY FIGURE 2:**

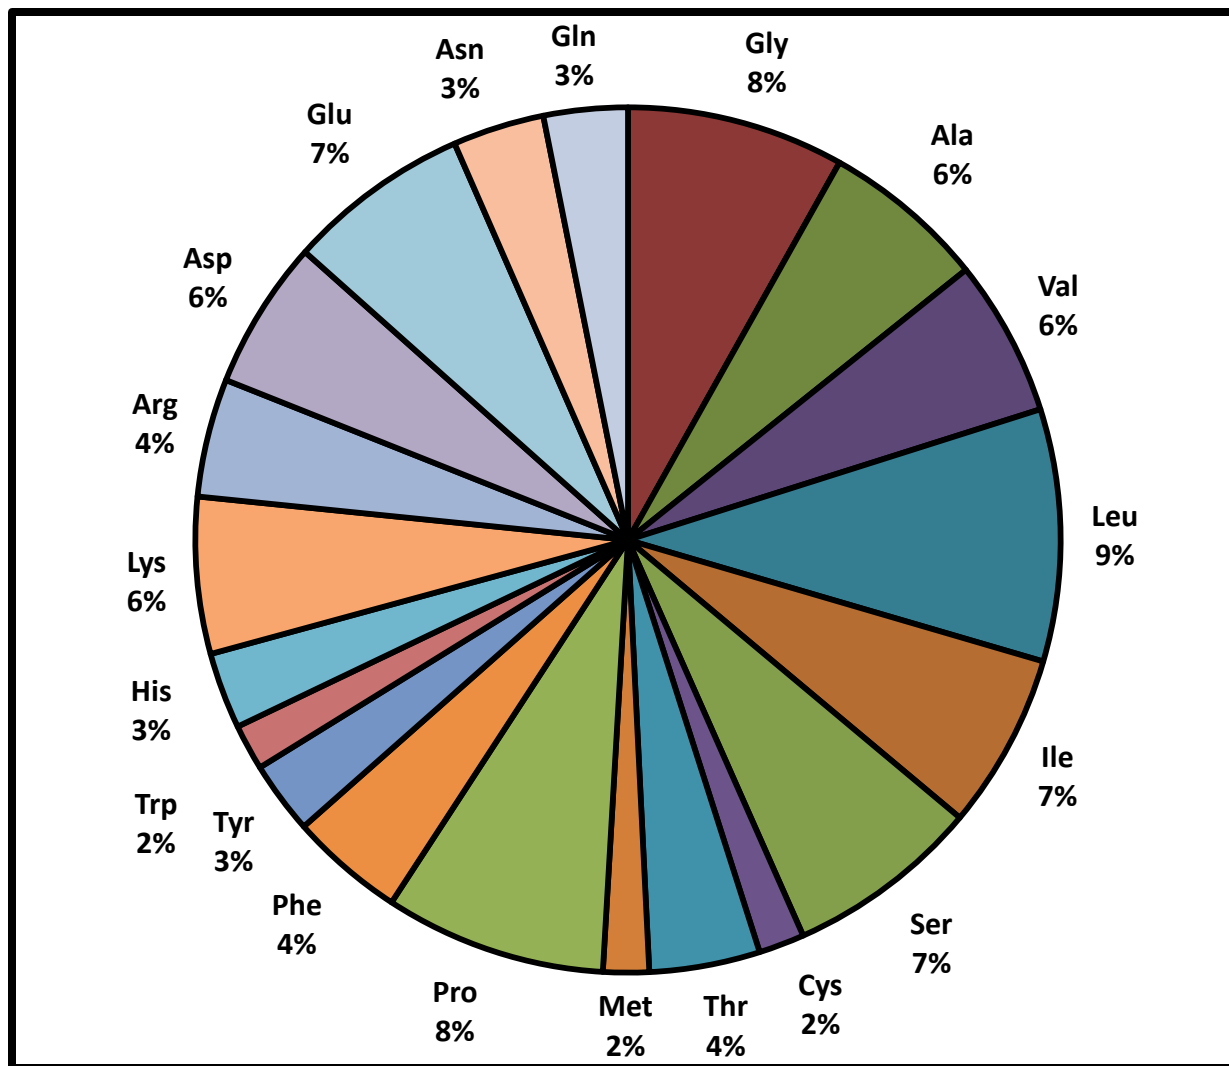

**SUPPLEMENTARY FIGURE 3**



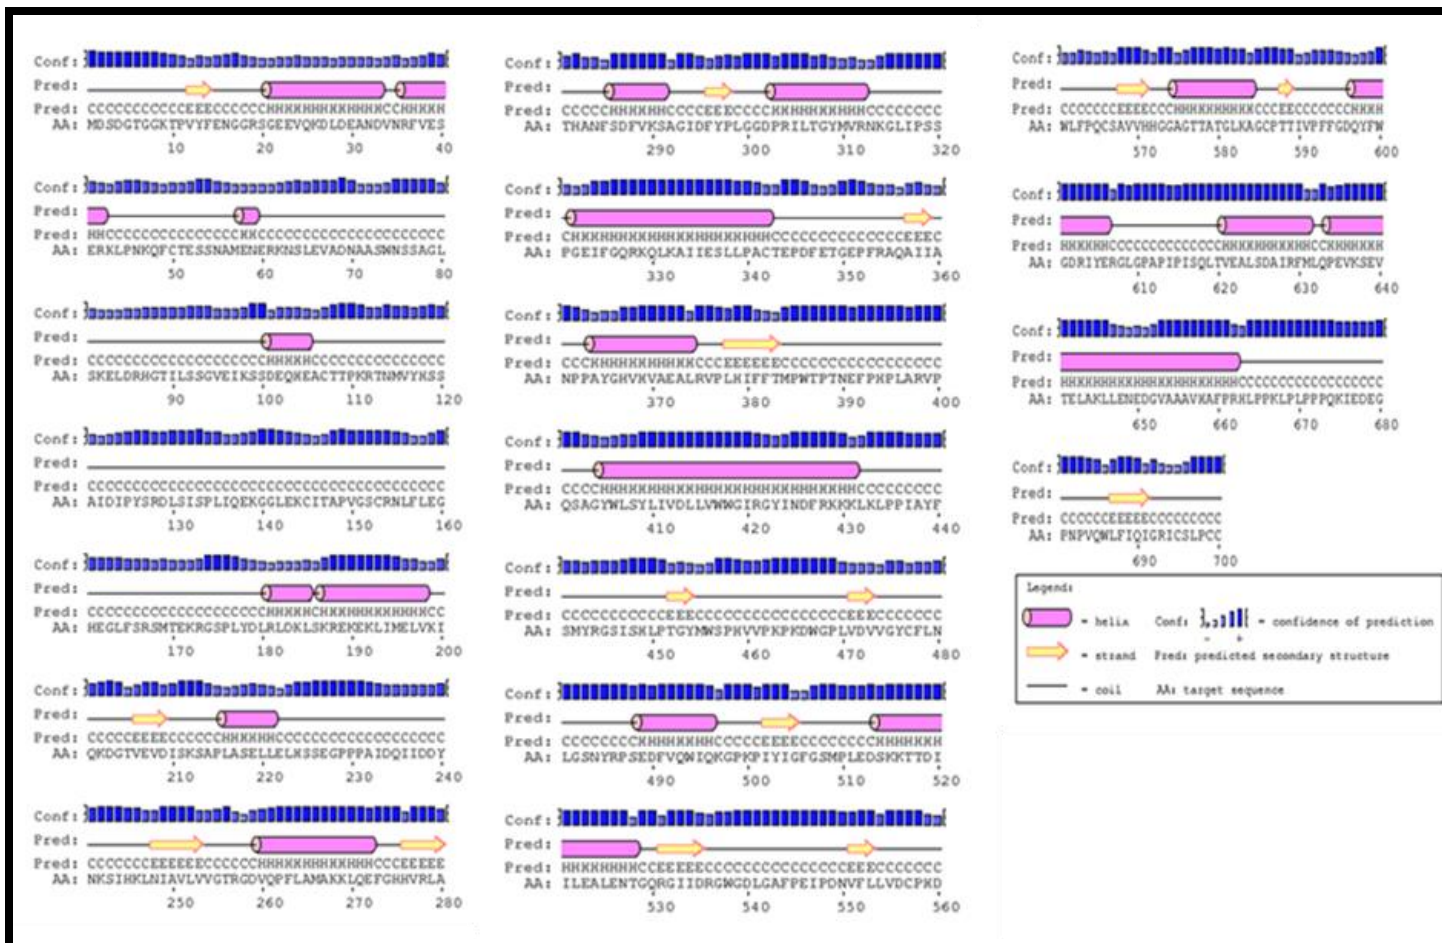

Secondary structure in GsSGT

Percentage of occurrence

Alpha helix

29.53

Extended strand

19.54

Random coil

50.93

**SUPPLEMENTARY FIGURE 4:**
